# Supplementary material for: Olaparib and Ceralasertib (AZD6738) in Patients with Triple-Negative Advanced Breast Cancer: Results from Cohort E of the plasmaMATCH Trial (CRUK/15/010)
Source: PubMed Central journal article supplement (PMC10690092; doi:10.1158/1078-0432.ccr-23-1696), 2023-09-29

**Olaparib and Celarasertib (AZD6738) in patients with triple negative advanced breast cancer:  
results from Cohort E of the plasmaMATCH trial (CRUK/15/010)**

**Supplementary material**

**Figure S1. CONSORT diagram**

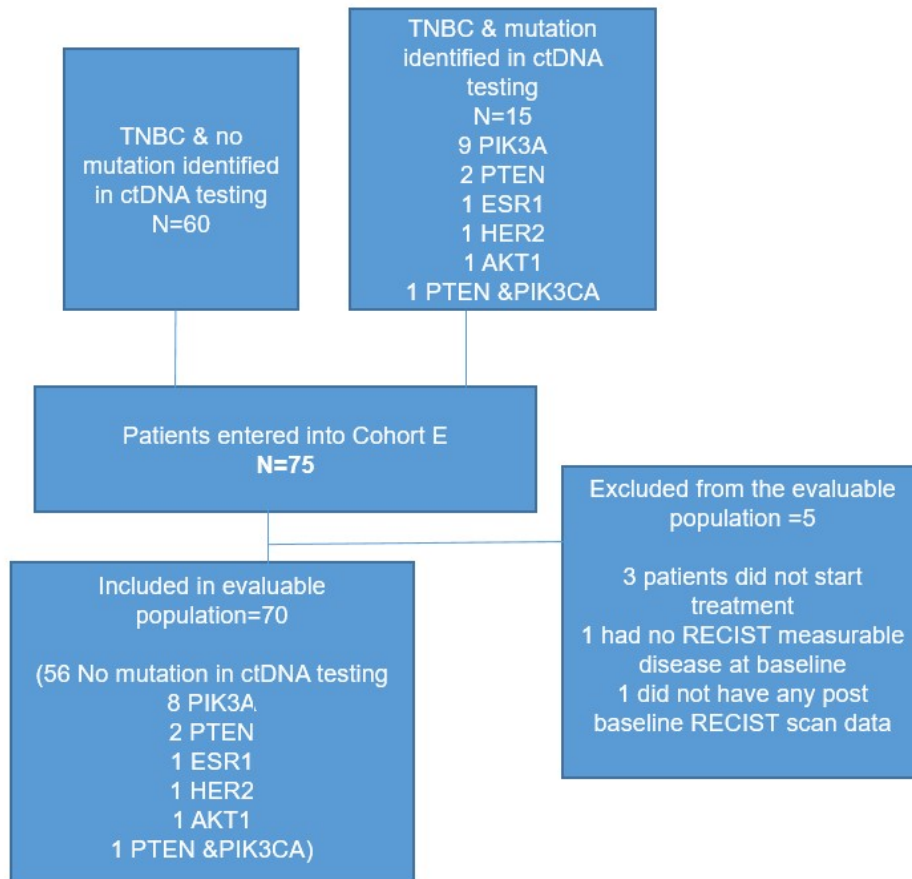

Supplement: ccr-23-1696_supplementary_figure_s1_suppfs1.pdf [file ccr-23-1696_supplementary_figure_s1_suppfs1.pdf]
