# Supplementary material for: Olaparib and Ceralasertib (AZD6738) in Patients with Triple-Negative Advanced Breast Cancer: Results from Cohort E of the plasmaMATCH Trial (CRUK/15/010)
Source: PubMed Central journal article supplement (PMC10690092; doi:10.1158/1078-0432.ccr-23-1696), 2023-09-29

**Figure S2. Progression free survival Kaplan Meier curve**

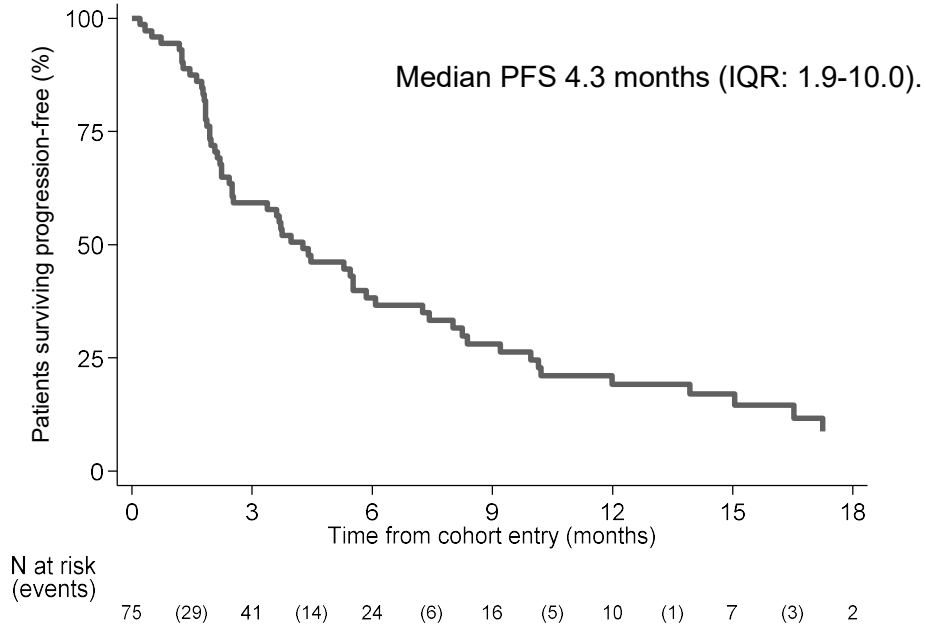

Supplement: ccr-23-1696_supplementary_figure_s2_suppfs2.pdf [file ccr-23-1696_supplementary_figure_s2_suppfs2.pdf]
