# Supplementary material for: Olaparib and Ceralasertib (AZD6738) in Patients with Triple-Negative Advanced Breast Cancer: Results from Cohort E of the plasmaMATCH Trial (CRUK/15/010)
Source: PubMed Central journal article supplement (PMC10690092; doi:10.1158/1078-0432.ccr-23-1696), 2023-09-29
Supplement: ccr-23-1696_supplementary_table_s1_suppts1.pdf [file ccr-23-1696_supplementary_table_s1_suppts1.pdf]

**Table S1. Additional baseline characteristics**

|                                                    | N=75 |      |
|----------------------------------------------------|------|------|
|                                                    | n    | %    |
| <b>Sex</b>                                         |      |      |
| Female                                             | 75   | 100  |
| <b>Age group (years) at registration</b>           |      |      |
| <50                                                | 26   | 34.7 |
| ≥50 & <60                                          | 21   | 28   |
| ≥60 & <70                                          | 20   | 26.7 |
| ≥70                                                | 8    | 10.7 |
| <b>Ethnicity</b>                                   |      |      |
| White: British                                     | 67   | 89.3 |
| White: Any other White background                  | 3    | 4    |
| Asian or Asian British: Indian                     | 1    | 1.3  |
| Black or Black British: Caribbean                  | 2    | 2.7  |
| Black or Black British: Any other Black background | 1    | 1.3  |
| Chinese or other ethnic group: Chinese             | 1    | 1.3  |
|                                                    |      |      |
