# Supplementary material for: Olaparib and Ceralasertib (AZD6738) in Patients with Triple-Negative Advanced Breast Cancer: Results from Cohort E of the plasmaMATCH Trial (CRUK/15/010)
Source: PubMed Central journal article supplement (PMC10690092; doi:10.1158/1078-0432.ccr-23-1696), 2023-09-29
Supplement: ccr-23-1696_supplementary_table_s3_suppts3.pdf [file ccr-23-1696_supplementary_table_s3_suppts3.pdf]

**Table S3. List of centres and recruitment**

| <b>Centre Name</b>                                         | <b>Total</b> |
|------------------------------------------------------------|--------------|
| Royal Marsden Hospital, London                             | 8            |
| Royal Marsden Hospital, Sutton                             | 7            |
| Royal Bournemouth Hospital, Bournemouth                    | 4            |
| University College London Hospital, London                 | 3            |
| Addenbrooke's Hospital, Cambridge                          | 2            |
| West of Scotland Beatson Cancer Centre, Glasgow            | 9            |
| Royal Devon and Exeter, Exeter                             | 4            |
| The Christie Hospital, Manchester                          | 15           |
| Western General Hospital, Edinburgh                        | 1            |
| Barts Health NHS Trust, London                             | 0            |
| Oxford University Hospitals NHS Trust, Oxford              | 1            |
| Velindre Cancer Centre, Cardiff                            | 1            |
| Royal Cornwall Hospital, Truro                             | 0            |
| Weston Park Hospital, Sheffield                            | 6            |
| University Hospitals Bristol NHS Foundation Trust, Bristol | 2            |
| University Hospital Southampton, Southampton               | 6            |
| Derriford Hospital, Plymouth                               | 1            |
| Nottingham University Hospitals NHS Trust, Nottingham      | 0            |
| Clatterbridge Cancer Centre, Clatterbridge                 | 1            |
| Kent Oncology Centre, Maidstone                            | 4            |
|                                                            | 75           |
