# Supplementary material for: Olaparib and Ceralasertib (AZD6738) in Patients with Triple-Negative Advanced Breast Cancer: Results from Cohort E of the plasmaMATCH Trial (CRUK/15/010)
Source: PubMed Central journal article supplement (PMC10690092; doi:10.1158/1078-0432.ccr-23-1696), 2023-09-29
Supplement: ccr-23-1696_supplementary_table_s4_suppts4.pdf [file ccr-23-1696_supplementary_table_s4_suppts4.pdf]

**Table S4: Activity according to biomarker subgroups: Progression free survival (median, IQR, months) in patients with *BRCA1/2* mutations (germline or somatic)**

|                       | <b>Confirmed response rate<br/>% (95%CI); n/N</b> | <b>N</b> | <b>Median PFS (IQR), months</b> |
|-----------------------|---------------------------------------------------|----------|---------------------------------|
| <b>ATM loss</b>       | 33.3 (0.8, 90.6); 1/3                             | 3        | 6.1 (6.1, 8.4)                  |
| <b>No ATM loss</b>    | 22.2 (2.8, 60.0); 2/9                             | 9        | 7.3 (4.5, 25.4)                 |
| <b>Cyclin E1 high</b> | 25.0 (0.6, 80.6); 1/4                             | 4        | 7.3 (4.3, 25.4)                 |
| <b>Cyclin E1 low</b>  | 33.0 (0.8, 90.6); 1/3                             | 3        | 6.1 (6.1, 8.4)                  |
| <b>RAD51 high</b>     | 16.7 (0.4, 64.1); 1/6                             | 6        | 8.4 (5.8-25.4)                  |
| <b>RAD51 low</b>      | 20.0 (0.5, 71.6); 1/5                             | 5        | 6.1 (4.5-undetermined)          |
