# Supplementary material for: Olaparib and Ceralasertib (AZD6738) in Patients with Triple-Negative Advanced Breast Cancer: Results from Cohort E of the plasmaMATCH Trial (CRUK/15/010)
Source: PubMed Central journal article supplement (PMC10690092; doi:10.1158/1078-0432.ccr-23-1696), 2023-09-29
Supplement: ccr-23-1696_supplementary_table_s5_suppts5.pdf [file ccr-23-1696_supplementary_table_s5_suppts5.pdf]

**Table S5. Worst grade CTCAE reported during treatment**

Note: AEs reported in the table below are where the AE was reported for  $\geq 10\%$  patients at any grade or where at least one patient has a grade 3+ AE. For a full list of AEs see appendix.

|                                     | G0 |    | G1 |    | G2 |    | G3 |    | G4 |   | G5 |   | Any grade |    | G3+ |    |
|-------------------------------------|----|----|----|----|----|----|----|----|----|---|----|---|-----------|----|-----|----|
|                                     | n  | %  | n  | %  | n  | %  | n  | %  | n  | % | n  | % | n         | %  | n   | %  |
| Abdominal pain                      | 63 | 88 | 5  | 7  | 1  | 1  | 3  | 4  | 0  | 0 | 0  | 0 | 9         | 13 | 3   | 4  |
| Anaemia                             | 44 | 61 | 10 | 14 | 9  | 13 | 9  | 13 | 0  | 0 | 0  | 0 | 28        | 39 | 9   | 13 |
| Arthralgia                          | 62 | 86 | 8  | 11 | 2  | 3  | 0  | 0  | 0  | 0 | 0  | 0 | 10        | 14 | 0   | 0  |
| Back pain                           | 60 | 83 | 5  | 7  | 6  | 8  | 1  | 1  | 0  | 0 | 0  | 0 | 12        | 17 | 1   | 1  |
| Chest pain                          | 66 | 92 | 4  | 6  | 1  | 1  | 1  | 1  | 0  | 0 | 0  | 0 | 6         | 8  | 1   | 1  |
| Constipation                        | 60 | 83 | 10 | 14 | 2  | 3  | 0  | 0  | 0  | 0 | 0  | 0 | 12        | 17 | 0   | 0  |
| Corona virus infection              | 71 | 99 | 0  | 0  | 0  | 0  | 0  | 0  | 0  | 0 | 1  | 1 | 1         | 1  | 1   | 1  |
| Cough                               | 56 | 78 | 12 | 17 | 4  | 6  | 0  | 0  | 0  | 0 | 0  | 0 | 16        | 22 | 0   | 0  |
| Decreased appetite                  | 55 | 76 | 13 | 18 | 4  | 6  | 0  | 0  | 0  | 0 | 0  | 0 | 17        | 24 | 0   | 0  |
| Diarrhoea                           | 49 | 68 | 19 | 26 | 2  | 3  | 1  | 1  | 1  | 1 | 0  | 0 | 23        | 32 | 2   | 3  |
| Dizziness                           | 62 | 86 | 6  | 8  | 4  | 6  | 0  | 0  | 0  | 0 | 0  | 0 | 10        | 14 | 0   | 0  |
| Dyspepsia                           | 63 | 88 | 5  | 7  | 4  | 6  | 0  | 0  | 0  | 0 | 0  | 0 | 9         | 13 | 0   | 0  |
| Dyspnoea                            | 56 | 78 | 8  | 11 | 6  | 8  | 1  | 1  | 1  | 1 | 0  | 0 | 16        | 22 | 2   | 3  |
| Fatigue                             | 21 | 29 | 31 | 43 | 15 | 21 | 5  | 7  | 0  | 0 | 0  | 0 | 51        | 71 | 5   | 7  |
| Febrile neutropenia                 | 71 | 99 | 0  | 0  | 0  | 0  | 1  | 1  | 0  | 0 | 0  | 0 | 1         | 1  | 1   | 1  |
| Gamma-glutamyltransferase increased | 62 | 86 | 4  | 6  | 2  | 3  | 4  | 6  | 0  | 0 | 0  | 0 | 10        | 14 | 4   | 6  |
| Haemoglobin decreased               | 71 | 99 | 0  | 0  | 0  | 0  | 1  | 1  | 0  | 0 | 0  | 0 | 1         | 1  | 1   | 1  |
| Headache                            | 57 | 79 | 13 | 18 | 1  | 1  | 1  | 1  | 0  | 0 | 0  | 0 | 15        | 21 | 1   | 1  |
| Hot flush                           | 65 | 90 | 5  | 7  | 2  | 3  | 0  | 0  | 0  | 0 | 0  | 0 | 7         | 10 | 0   | 0  |
| Hypertension                        | 51 | 71 | 4  | 6  | 5  | 7  | 12 | 17 | 0  | 0 | 0  | 0 | 21        | 29 | 12  | 17 |
| Hypokalaemia                        | 71 | 99 | 0  | 0  | 0  | 0  | 0  | 0  | 1  | 1 | 0  | 0 | 1         | 1  | 1   | 1  |
| Hyponatraemia                       | 71 | 99 | 0  | 0  | 0  | 0  | 1  | 1  | 0  | 0 | 0  | 0 | 1         | 1  | 1   | 1  |
| Intestinal perforation              | 71 | 99 | 0  | 0  | 0  | 0  | 1  | 1  | 0  | 0 | 0  | 0 | 1         | 1  | 1   | 1  |

|                         | G0 |    | G1 |    | G2 |    | G3 |   | G4 |   | G5 |   | Any grade |    | G3+ |   |
|-------------------------|----|----|----|----|----|----|----|---|----|---|----|---|-----------|----|-----|---|
|                         | n  | %  | n  | %  | n  | %  | n  | % | n  | % | n  | % | n         | %  | n   | % |
| Leukopenia              | 63 | 88 | 6  | 8  | 3  | 4  | 0  | 0 | 0  | 0 | 0  | 0 | 9         | 13 | 0   | 0 |
| Lymphopenia             | 53 | 74 | 8  | 11 | 9  | 13 | 2  | 3 | 0  | 0 | 0  | 0 | 19        | 26 | 2   | 3 |
| Mucosal inflammation    | 71 | 99 | 0  | 0  | 0  | 0  | 1  | 1 | 0  | 0 | 0  | 0 | 1         | 1  | 1   | 1 |
| Nausea                  | 29 | 40 | 32 | 44 | 11 | 15 | 0  | 0 | 0  | 0 | 0  | 0 | 43        | 60 | 0   | 0 |
| Neutropenia             | 65 | 90 | 5  | 7  | 1  | 1  | 0  | 0 | 1  | 1 | 0  | 0 | 7         | 10 | 1   | 1 |
| Neutropenic sepsis      | 71 | 99 | 0  | 0  | 0  | 0  | 1  | 1 | 0  | 0 | 0  | 0 | 1         | 1  | 1   | 1 |
| Oedema peripheral       | 68 | 94 | 2  | 3  | 1  | 1  | 1  | 1 | 0  | 0 | 0  | 0 | 4         | 6  | 1   | 1 |
| Pain                    | 61 | 85 | 4  | 6  | 4  | 6  | 3  | 4 | 0  | 0 | 0  | 0 | 11        | 15 | 3   | 4 |
| Pulmonary embolism      | 71 | 99 | 0  | 0  | 0  | 0  | 1  | 1 | 0  | 0 | 0  | 0 | 1         | 1  | 1   | 1 |
| Thrombocytopenia        | 66 | 92 | 4  | 6  | 1  | 1  | 1  | 1 | 0  | 0 | 0  | 0 | 6         | 8  | 1   | 1 |
| Transaminases increased | 59 | 82 | 10 | 14 | 2  | 3  | 1  | 1 | 0  | 0 | 0  | 0 | 13        | 18 | 1   | 1 |
| Urinary tract infection | 65 | 90 | 2  | 3  | 4  | 6  | 1  | 1 | 0  | 0 | 0  | 0 | 7         | 10 | 1   | 1 |
| Vomiting                | 58 | 81 | 11 | 15 | 3  | 4  | 0  | 0 | 0  | 0 | 0  | 0 | 14        | 19 | 0   | 0 |
